# Supplementary material for: Transcriptional responses of the nerve agent-sensitive brain regions amygdala, hippocampus, piriform cortex, septum, and thalamus following exposure to the organophosphonate anticholinesterase sarin
Source: J Neuroinflammation. 2011 Jul 21;8:84. doi: 10.1186/1742-2094-8-84 (PMC3180277; doi:10.1186/1742-2094-8-84)
Supplement: Additional file 5 — Top 800 significantly altered genes in amygdala post-seizure onset used for gene ontology analysis. [file 1742-2094-8-84-S5.XLS]

## Sheet: Sheet0
	Top 800 Significantly Altered Genes in Amygdala Post-Seizure Onset used for Gene Ontology Analysis
	Entrez Gene Name	Symbol	p-value
	chemokine (C-C motif) ligand 3	CCL3	1.23E−20
	CCAAT/enhancer binding protein (C/EBP), delta	CEBPD	4.93E−20
	thyrotropin-releasing hormone	TRH	2.86E−19
	perilipin 2	PLIN2	5.96E−19
	tubulin, beta 6	TUBB6	8.70E−19
	growth arrest and DNA-damage-inducible, gamma	GADD45G	1.84E−18
	transmembrane BAX inhibitor motif containing 1	TMBIM1	2.55E−18
	sulfiredoxin 1	SRXN1	2.81E−18
	FBJ murine osteosarcoma viral oncogene homolog	FOS	3.01E−18
	glycoprotein (transmembrane) nmb	GPNMB	6.45E−18
	cysteine-serine-rich nuclear protein 1	CSRNP1	8.52E−18
	lipocalin 2	LCN2	1.03E−17
	G1 to S phase transition 1	GSPT1	1.18E−17
	F-box protein 33	FBXO33	2.25E−17
	protein phosphatase 1, regulatory (inhibitor) subunit 15A	PPP1R15A	3.53E−17
	brain-derived neurotrophic factor	BDNF	3.73E−17
	bromodomain adjacent to zinc finger domain, 1A	BAZ1A	4.61E−17
	CD44 molecule (Indian blood group)	CD44	4.95E−17
	twinfilin, actin-binding protein, homolog 1 (Drosophila)	TWF1	6.92E−17
	doublecortin-like kinase 1	DCLK1	7.79E−17
	mitogen-activated protein kinase kinase 3	MAP2K3	9.78E−17
	cAMP responsive element modulator	CREM	1.23E−16
	homer homolog 1 (Drosophila)	HOMER1	2.88E−16
	UDP-GlcNAc:betaGal beta-1,3-N-acetylglucosaminyltransferase 1	B3GNT1	3.17E−16
	TGFB-induced factor homeobox 1	TGIF1	5.50E−16
	jun B proto-oncogene	JUNB	5.57E−16
	coenzyme Q10 homolog B (S. cerevisiae)	COQ10B	5.57E−16
	TP53 regulating kinase	TP53RK	7.50E−16
	myeloid differentiation primary response gene (88)	MYD88	1.02E−15
	Ras homolog enriched in brain	RHEB	1.03E−15
	nuclear factor, interleukin 3 regulated	NFIL3	1.19E−15
	phosphatidic acid phosphatase type 2B	PPAP2B	1.22E−15
	tissue factor pathway inhibitor 2	TFPI2	1.47E−15
	mitogen-activated protein kinase kinase 6	MAP2K6	1.49E−15
	jun proto-oncogene	JUN	1.54E−15
	family with sequence similarity 129, member B	FAM129B	1.79E−15
	heme oxygenase (decycling) 1	HMOX1	1.83E−15
	RNA (guanine-9-) methyltransferase domain containing 1	RG9MTD1	1.87E−15
	pleckstrin 2	PLEK2	2.92E−15
	signal transducer and activator of transcription 3 (acute-phase response factor)	STAT3	3.08E−15
	caspase 3, apoptosis-related cysteine peptidase	CASP3	3.24E−15
	regulator of G-protein signaling 2, 24kDa	RGS2	3.69E−15
	nuclear autoantigenic sperm protein (histone-binding)	NASP	3.98E−15
	metadherin	MTDH	4.26E−15
	ribonuclease/angiogenin inhibitor 1	RNH1	6.56E−15
	CD14 molecule	CD14	6.74E−15
	emerin	EMD	9.88E−15
	CCAAT/enhancer binding protein (C/EBP), beta	CEBPB	1.11E−14
	poliovirus receptor	PVR	1.19E−14
	growth arrest and DNA-damage-inducible, beta	GADD45B	1.21E−14
	GTP binding protein overexpressed in skeletal muscle	GEM	1.25E−14
	nuclear factor of kappa light polypeptide gene enhancer in B-cells inhibitor, zeta	NFKBIZ	1.28E−14
	cysteine dioxygenase, type I	CDO1	1.33E−14
	tumor necrosis factor, alpha-induced protein 6	TNFAIP6	1.44E−14
	RAN binding protein 2	RANBP2	1.49E−14
	growth arrest and DNA-damage-inducible, alpha	GADD45A	1.63E−14
	Ras association (RalGDS/AF-6) domain family member 1	RASSF1	1.99E−14
	ATG16 autophagy related 16-like 1 (S. cerevisiae)	ATG16L1	2.07E−14
	inositol 1,4,5-trisphosphate 3-kinase C	ITPKC	2.18E−14
	activating transcription factor 4 (tax-responsive enhancer element B67)	ATF4	3.10E−14
	TCDD-inducible poly(ADP-ribose) polymerase	TIPARP	4.12E−14
	eukaryotic translation initiation factor 6	EIF6	4.25E−14
	Kruppel-like factor 15	KLF15	4.26E−14
	tenascin C	TNC	5.39E−14
	ariadne homolog, ubiquitin-conjugating enzyme E2 binding protein, 1 (Drosophila)	ARIH1	5.58E−14
	Ras-related associated with diabetes	RRAD	6.12E−14
	chemokine (C-C motif) ligand 7	CCL7	6.58E−14
	FERM and PDZ domain containing 1	FRMPD1	6.68E−14
	ras homolog gene family, member C	RHOC	7.12E−14
	ubiquitin associated and SH3 domain containing B	UBASH3B	7.54E−14
	metallothionein 1F	MT1F	7.59E−14
	regulator of G-protein signaling 4	RGS4	8.30E−14
	cardiotrophin-like cytokine factor 1	CLCF1	9.54E−14
	prostaglandin-endoperoxide synthase 2 (prostaglandin G/H synthase and cyclooxygenase)	PTGS2	9.96E−14
	heterogeneous nuclear ribonucleoprotein F	HNRNPF	1.12E−13
	carbohydrate sulfotransferase 10	CHST10	1.30E−13
	karyopherin alpha 6 (importin alpha 7)	KPNA6	1.42E−13
	sorting nexin 18	SNX18	1.42E−13
	interferon regulatory factor 8	IRF8	1.70E−13
	activity-regulated cytoskeleton-associated protein	ARC	1.72E−13
	VGF nerve growth factor inducible	VGF	1.97E−13
	dual specificity phosphatase 5	DUSP5	2.07E−13
	Cbp/p300-interacting transactivator, with Glu/Asp-rich carboxy-terminal domain, 2	CITED2	2.13E−13
	matrix metallopeptidase 9 (gelatinase B, 92kDa gelatinase, 92kDa type IV collagenase)	MMP9	2.18E−13
	metallothionein 1E	MT1E	2.22E−13
	claudin 10	CLDN10	2.27E−13
	heat shock 27kDa protein 1	HSPB1	2.70E−13
	oxidized low density lipoprotein (lectin-like) receptor 1	OLR1	2.84E−13
	poliovirus receptor-related 3	PVRL3	2.98E−13
	H19, imprinted maternally expressed transcript (non-protein coding)	H19	3.15E−13
	nucleoporin 93kDa	NUP93	3.43E−13
	early growth response 4	EGR4	3.71E−13
	heat shock 22kDa protein 8	HSPB8	3.77E−13
	tropomyosin 3	TPM3	3.94E−13
	splA/ryanodine receptor domain and SOCS box containing 1	SPSB1	4.04E−13
	DnaJ (Hsp40) homolog, subfamily B, member 11	DNAJB11	4.04E−13
	GTP cyclohydrolase 1	GCH1	4.05E−13
	nudE nuclear distribution gene E homolog (A. nidulans)-like 1	NDEL1	4.18E−13
	sprouty homolog 2 (Drosophila)	SPRY2	4.23E−13
	chaperonin containing TCP1, subunit 5 (epsilon)	CCT5	4.36E−13
	early growth response 2	EGR2	4.58E−13
	glycerol-3-phosphate dehydrogenase 1 (soluble)	GPD1	4.85E−13
	sterol regulatory element binding transcription factor 1	SREBF1	4.97E−13
	proprotein convertase subtilisin/kexin type 1	PCSK1	5.22E−13
	lamin A/C	LMNA	5.50E−13
	TSC22 domain family, member 3	TSC22D3	5.63E−13
	interleukin 1 receptor, type II	IL1R2	6.05E−13
	ring finger protein 19B	RNF19B	6.49E−13
	CASP8 and FADD-like apoptosis regulator	CFLAR	7.73E−13
	TAR DNA binding protein	TARDBP	8.52E−13
	dual specificity phosphatase 6	DUSP6	8.70E−13
	neuronal pentraxin II	NPTX2	9.81E−13
	synaptotagmin IV	SYT4	1.09E−12
	methylmalonyl CoA mutase	MUT	1.09E−12
	golgin, RAB6-interacting	GORAB	1.29E−12
	superoxide dismutase 2, mitochondrial	SOD2	1.30E−12
	IMP (inosine 5'-monophosphate) dehydrogenase 2	IMPDH2	1.34E−12
	ret proto-oncogene	RET	1.41E−12
	microtubule-associated protein, RP/EB family, member 1	MAPRE1	1.44E−12
	protein phosphatase 4, regulatory subunit 1	PPP4R1	1.54E−12
	complement component 5a receptor 1	C5AR1	1.61E−12
	leucine rich repeat containing 59	LRRC59	1.64E−12
	BCL2-associated athanogene 3	BAG3	1.70E−12
	synaptotagmin binding, cytoplasmic RNA interacting protein	SYNCRIP	1.73E−12
	heat shock 105kDa/110kDa protein 1	HSPH1	1.75E−12
	enhancer of zeste homolog 1 (Drosophila)	EZH1	1.76E−12
	ankyrin repeat domain 57	ANKRD57	1.80E−12
	G protein-coupled receptor, family C, group 5, member B	GPRC5B	2.07E−12
	podoplanin	PDPN	2.11E−12
	ADP-ribosylation factor 6	ARF6	2.13E−12
	serine palmitoyltransferase, long chain base subunit 2	SPTLC2	2.17E−12
	phosphatidylinositol binding clathrin assembly protein	PICALM	2.31E−12
	four jointed box 1 (Drosophila)	FJX1	2.34E−12
	lymphocyte cytosolic protein 1 (L-plastin)	LCP1	2.59E−12
	heterogeneous nuclear ribonucleoprotein A/B	HNRNPAB	2.62E−12
	SRY (sex determining region Y)-box 4	SOX4	2.79E−12
	Ras protein-specific guanine nucleotide-releasing factor 1	RASGRF1	3.06E−12
	calcitonin-related polypeptide beta	CALCB	3.12E−12
	G protein-coupled receptor 19	GPR19	3.20E−12
	rearranged L-myc fusion	RLF	3.37E−12
	Lix1 homolog (chicken)	LIX1	3.40E−12
	leucine rich repeat neuronal 2	LRRN2	3.49E−12
	BTG family, member 2	BTG2	3.81E−12
	fibrillarin	FBL	3.94E−12
	early growth response 1	EGR1	4.04E−12
	ras homolog gene family, member Q	RHOQ	4.11E−12
	ring finger protein 112	RNF112	4.27E−12
	zinc finger protein 467	ZNF467	4.30E−12
	legumain	LGMN	4.70E−12
	chromosome X open reading frame 56	CXorf56	4.86E−12
	leucine rich repeat (in FLII) interacting protein 1	LRRFIP1	4.88E−12
	importin 5	IPO5	5.00E−12
	chaperonin containing TCP1, subunit 3 (gamma)	CCT3	5.00E−12
	ornithine decarboxylase 1	ODC1	5.07E−12
	shroom family member 2	SHROOM2	5.26E−12
	elongation factor, RNA polymerase II, 2	ELL2	5.56E−12
	protein tyrosine phosphatase, non-receptor type 12	PTPN12	6.55E−12
	nuclear receptor subfamily 4, group A, member 3	NR4A3	6.88E−12
	chaperonin containing TCP1, subunit 4 (delta)	CCT4	7.36E−12
	transcription elongation factor B (SIII), polypeptide 3 (110kDa, elongin A)	TCEB3	7.55E−12
	neural precursor cell expressed, developmentally down-regulated 9	NEDD9	8.19E−12
	peptidylprolyl isomerase G (cyclophilin G)	PPIG	8.88E−12
	lectin, galactoside-binding, soluble, 3	LGALS3	9.71E−12
	E2F transcription factor 5, p130-binding	E2F5	9.73E−12
	Ras association (RalGDS/AF-6) domain family member 4	RASSF4	1.01E−11
	poly(A) binding protein, cytoplasmic 4 (inducible form)	PABPC4	1.17E−11
	actin-binding Rho activating protein	ABRA	1.19E−11
	protein tyrosine phosphatase type IVA, member 1	PTP4A1	1.21E−11
	aminoadipate-semialdehyde synthase	AASS	1.27E−11
	prominin 1	PROM1	1.29E−11
	FCH domain only 2	FCHO2	1.31E−11
	Sec61 alpha 1 subunit (S. cerevisiae)	SEC61A1	1.32E−11
	hairy and enhancer of split 5 (Drosophila)	HES5	1.32E−11
	midnolin	MIDN	1.32E−11
	block of proliferation 1	BOP1/LOC727967	1.37E−11
	KIAA0020	KIAA0020	1.52E−11
	calcium activated nucleotidase 1	CANT1	1.56E−11
	oligonucleotide/oligosaccharide-binding fold containing 2A	OBFC2A	1.65E−11
	adenylosuccinate synthase	ADSS	1.66E−11
	glutamyl-prolyl-tRNA synthetase	EPRS	1.68E−11
	calcium regulated heat stable protein 1, 24kDa	CARHSP1	1.79E−11
	purine-rich element binding protein B	PURB	1.98E−11
	nicotinamide phosphoribosyltransferase	NAMPT	1.98E−11
	CD86 molecule	CD86	2.00E−11
	nuclear receptor subfamily 4, group A, member 2	NR4A2	2.09E−11
	eukaryotic translation initiation factor 5A	EIF5A	2.24E−11
	UDP-Gal:betaGlcNAc beta 1,4- galactosyltransferase, polypeptide 5	B4GALT5	2.32E−11
	purinergic receptor P2Y, G-protein coupled, 12	P2RY12	2.33E−11
	regulator of calcineurin 1	RCAN1	2.38E−11
	ADAM metallopeptidase with thrombospondin type 1 motif, 9	ADAMTS9	2.44E−11
	C1q and tumor necrosis factor related protein 4	C1QTNF4	2.47E−11
	ADAM metallopeptidase with thrombospondin type 1 motif, 1	ADAMTS1	2.47E−11
	calponin 3, acidic	CNN3	2.51E−11
	pellino homolog 1 (Drosophila)	PELI1	2.53E−11
	ST3 beta-galactoside alpha-2,3-sialyltransferase 4	ST3GAL4	2.54E−11
	cyclin M3	CNNM3	2.68E−11
	platelet-activating factor acetylhydrolase 1b, regulatory subunit 1 (45kDa)	PAFAH1B1	2.75E−11
	SMAD family member 1	SMAD1	2.93E−11
	solute carrier organic anion transporter family, member 1C1	SLCO1C1	2.94E−11
	FK506 binding protein 5	FKBP5	2.95E−11
	protein C receptor, endothelial	PROCR	3.05E−11
	inhibin, beta A	INHBA	3.08E−11
	serpin peptidase inhibitor, clade A (alpha-1 antiproteinase, antitrypsin), member 3	SERPINA3	3.37E−11
	moesin	MSN	3.52E−11
	secreted phosphoprotein 1	SPP1	3.60E−11
	tetraspanin 5	TSPAN5	3.61E−11
	oligodendrocyte myelin glycoprotein	OMG	4.15E−11
	hypoxia inducible factor 1, alpha subunit (basic helix-loop-helix transcription factor)	HIF1A	4.39E−11
	3-oxoacid CoA transferase 1	OXCT1	4.40E−11
	protein kinase, cAMP-dependent, catalytic, alpha	PRKACA	4.42E−11
	dual specificity phosphatase 1	DUSP1	4.53E−11
	PDZ and LIM domain 4	PDLIM4	4.56E−11
	programmed cell death 6 interacting protein	PDCD6IP	4.72E−11
	programmed cell death 4 (neoplastic transformation inhibitor)	PDCD4	4.74E−11
	nuclear factor of kappa light polypeptide gene enhancer in B-cells 1	NFKB1	5.09E−11
	cysteine/histidine-rich 1	CYHR1	5.26E−11
	deiodinase, iodothyronine, type II	DIO2	5.55E−11
	TIMP metallopeptidase inhibitor 1	TIMP1	5.67E−11
	Y box binding protein 1	YBX1	5.70E−11
	coiled-coil domain containing 86	CCDC86	5.74E−11
	chloride intracellular channel 1	CLIC1	5.78E−11
	GTP binding protein 4	GTPBP4	6.03E−11
	phospholipase C, epsilon 1	PLCE1	6.06E−11
	chromosome 9 open reading frame 3	C9orf3	6.11E−11
	malectin	MLEC	6.40E−11
	proteasome (prosome, macropain) 26S subunit, non-ATPase, 11	PSMD11	6.57E−11
	peroxidasin homolog (Drosophila)	PXDN	6.77E−11
	chromosome 12 open reading frame 52	C12orf52	6.84E−11
	polo-like kinase 4	PLK4	6.88E−11
	AT rich interactive domain 5B (MRF1-like)	ARID5B	7.04E−11
	insulin-like growth factor binding protein 5	IGFBP5	7.22E−11
	Ly1 antibody reactive homolog (mouse)	LYAR	7.28E−11
	solute carrier family 9 (sodium/hydrogen exchanger), member 3 regulator 1	SLC9A3R1	7.50E−11
	sestrin 1	SESN1	7.81E−11
	cell cycle progression 1	CCPG1	8.58E−11
	RIO kinase 3 (yeast)	RIOK3	8.71E−11
	vacuolar protein sorting 37 homolog B (S. cerevisiae)	VPS37B	9.10E−11
	hairy and enhancer of split 6 (Drosophila)	HES6	9.74E−11
	phosphoribosylaminoimidazole carboxylase, phosphoribosylaminoimidazole succinocarboxamide synthetase	PAICS	1.02E−10
	CTTNBP2 N-terminal like	CTTNBP2NL	1.13E−10
	leucine rich repeat transmembrane neuronal 1	LRRTM1	1.14E−10
	golgi membrane protein 1	GOLM1	1.18E−10
	interleukin 11	IL11	1.22E−10
	apoptosis-inducing factor, mitochondrion-associated, 3	AIFM3	1.22E−10
	nucleoporin 205kDa	NUP205	1.22E−10
	nuclear factor of kappa light polypeptide gene enhancer in B-cells inhibitor, alpha	NFKBIA	1.23E−10
	centrosomal protein 70kDa	CEP70	1.24E−10
	prolyl 4-hydroxylase, beta polypeptide	P4HB	1.24E−10
	DnaJ (Hsp40) homolog, subfamily B, member 1	DNAJB1	1.26E−10
	ubiquitin-conjugating enzyme E2F (putative)	UBE2F	1.26E−10
	chemokine (C-X-C motif) ligand 2	CXCL2	1.27E−10
	dual specificity phosphatase 2	DUSP2	1.28E−10
	endothelin converting enzyme 2	ECE2	1.37E−10
	serine/threonine kinase 40	STK40	1.39E−10
	suppressor of cytokine signaling 6	SOCS6	1.42E−10
	transcriptional regulating factor 1	TRERF1	1.42E−10
	DEAH (Asp-Glu-Ala-His) box polypeptide 15	DHX15	1.47E−10
	protein tyrosine phosphatase, non-receptor type 1	PTPN1	1.55E−10
	family with sequence similarity 189, member B	FAM189B	1.56E−10
	ADP-ribosylation factor-like 4D	ARL4D	1.66E−10
	phosphodiesterase 4D, cAMP-specific	PDE4D	1.68E−10
	A kinase (PRKA) anchor protein 7	AKAP7	1.68E−10
	calcineurin binding protein 1	CABIN1	1.71E−10
	S100 calcium binding protein A10	S100A10	1.77E−10
	sphingosine kinase 1	SPHK1	1.79E−10
	KIAA0146	KIAA0146	1.80E−10
	myeloid cell leukemia sequence 1 (BCL2-related)	MCL1	1.87E−10
	spermidine synthase	SRM	1.88E−10
	EH domain binding protein 1-like 1	EHBP1L1	1.98E−10
	aarF domain containing kinase 4	ADCK4	2.17E−10
	immediate early response 5	IER5	2.28E−10
	CD93 molecule	CD93	2.29E−10
	prostate transmembrane protein, androgen induced 1	PMEPA1	2.30E−10
	phosphoserine aminotransferase 1	PSAT1	2.33E−10
	phospholipase A2-activating protein	PLAA	2.37E−10
	NOP2 nucleolar protein homolog (yeast)	NOP2	2.38E−10
	poly(rC) binding protein 3	PCBP3	2.39E−10
	sprouty homolog 1, antagonist of FGF signaling (Drosophila)	SPRY1	2.48E−10
	synuclein, beta	SNCB	2.54E−10
	ELL associated factor 1	EAF1	2.65E−10
	D site of albumin promoter (albumin D-box) binding protein	DBP	2.65E−10
	sestrin 3	SESN3	2.80E−10
	guanylate cyclase 1, soluble, alpha 3	GUCY1A3	2.80E−10
	SH2B adaptor protein 2	SH2B2	2.91E−10
	GLIS family zinc finger 2	GLIS2	3.02E−10
	ADP-ribosylation factor 4	ARF4	3.03E−10
	hematological and neurological expressed 1-like	HN1L	3.26E−10
	solute carrier family 39 (zinc transporter), member 14	SLC39A14	3.28E−10
	high mobility group AT-hook 1	HMGA1	3.55E−10
	THO complex 4	THOC4	3.61E−10
	myosin, light chain 1, alkali; skeletal, fast	MYL1	3.62E−10
	arginyl-tRNA synthetase	RARS	3.62E−10
	cytidine monophosphate (UMP-CMP) kinase 2, mitochondrial	CMPK2	3.68E−10
	proline dehydrogenase (oxidase) 1	PRODH	3.82E−10
	Sec23 homolog B (S. cerevisiae)	SEC23B	4.35E−10
	purinergic receptor P2Y, G-protein coupled, 2	P2RY2	4.56E−10
	tumor necrosis factor	TNF	4.81E−10
	thioredoxin reductase 1	TXNRD1	4.86E−10
	interleukin-1 receptor-associated kinase 2	IRAK2	5.32E−10
	secretogranin II	SCG2	5.42E−10
	glutathione synthetase	GSS	5.52E−10
	major vault protein	MVP	5.56E−10
	acidic (leucine-rich) nuclear phosphoprotein 32 family, member B	ANP32B	5.75E−10
	eukaryotic translation initiation factor 3, subunit D	EIF3D	5.80E−10
	aldehyde dehydrogenase 18 family, member A1	ALDH18A1	6.08E−10
	syndecan 4	SDC4	6.44E−10
	pleckstrin homology domain containing, family F (with FYVE domain) member 1	PLEKHF1	6.46E−10
	cell cycle associated protein 1	CAPRIN1	6.49E−10
	bromodomain containing 3	BRD3	6.57E−10
	nuclear receptor subfamily 4, group A, member 1	NR4A1	6.61E−10
	thrombospondin, type I, domain containing 7B	THSD7B	6.65E−10
	cytokine induced apoptosis inhibitor 1	CIAPIN1	6.71E−10
	glutamate receptor, ionotropic, AMPA 2	GRIA2	7.04E−10
	heat shock 60kDa protein 1 (chaperonin)	HSPD1	7.04E−10
	cytoplasmic linker associated protein 2	CLASP2	7.41E−10
	progestin and adipoQ receptor family member IV	PAQR4	7.46E−10
	plasminogen activator, tissue	PLAT	7.98E−10
	proteasome (prosome, macropain) 26S subunit, non-ATPase, 5	PSMD5	8.06E−10
	SWI/SNF related, matrix associated, actin dependent regulator of chromatin, subfamily a, member 2	SMARCA2	8.25E−10
	RGM domain family, member A	RGMA	8.39E−10
	SMAD family member 2	SMAD2	8.54E−10
	excision repair cross-complementing rodent repair deficiency, complementation group 1 (includes overlapping antisense sequence)	ERCC1	9.08E−10
	isopentenyl-diphosphate delta isomerase 1	IDI1	9.11E−10
	eukaryotic translation initiation factor 3, subunit B	EIF3B	9.66E−10
	DnaJ (Hsp40) homolog, subfamily C, member 3	DNAJC3	9.85E−10
	ATP-binding cassette, sub-family G (WHITE), member 1	ABCG1	1.03E−09
	testis derived transcript (3 LIM domains)	TES	1.03E−09
	ChaC, cation transport regulator homolog 1 (E. coli)	CHAC1	1.06E−09
	translocator protein (18kDa)	TSPO	1.08E−09
	myotubularin related protein 2	MTMR2	1.09E−09
	threonyl-tRNA synthetase	TARS	1.10E−09
	immediate early response 5-like	IER5L	1.12E−09
	major histocompatibility complex, class II, DM beta	HLA-DMB	1.17E−09
	ral guanine nucleotide dissociation stimulator-like 1	RGL1	1.20E−09
	runt-related transcription factor 1	RUNX1	1.29E−09
	exoribonuclease 1	ERI1	1.30E−09
	transmembrane protein 100	TMEM100	1.34E−09
	interleukin 6 (interferon, beta 2)	IL6	1.38E−09
	serine/threonine kinase 17b	STK17B	1.48E−09
	gamma-aminobutyric acid (GABA) A receptor, alpha 5	GABRA5	1.51E−09
	transforming growth factor, beta 1	TGFB1	1.53E−09
	serine/threonine kinase receptor associated protein	STRAP	1.53E−09
	zinc finger, MYND-type containing 8	ZMYND8	1.55E−09
	potassium channel, subfamily K, member 10	KCNK10	1.61E−09
	NHP2 non-histone chromosome protein 2-like 1 (S. cerevisiae)	NHP2L1	1.65E−09
	homer homolog 3 (Drosophila)	HOMER3	1.67E−09
	BTB (POZ) domain containing 2	BTBD2	1.69E−09
	N(alpha)-acetyltransferase 50, NatE catalytic subunit	NAA50	1.70E−09
	ATP-binding cassette, sub-family A (ABC1), member 8	ABCA8	1.72E−09
	adaptor protein, phosphotyrosine interaction, PH domain and leucine zipper containing 2	APPL2	1.74E−09
	corticotropin releasing hormone	CRH	1.81E−09
	suppressor of cytokine signaling 3	SOCS3	1.98E−09
	abhydrolase domain containing 2	ABHD2	2.01E−09
	plexin A3	PLXNA3	2.01E−09
	sterol-C4-methyl oxidase-like	SC4MOL	2.02E−09
	ADP-ribosylation factor-like 4A	ARL4A	2.03E−09
	deoxynucleotidyltransferase, terminal, interacting protein 2	DNTTIP2	2.09E−09
	amyloid beta (A4) precursor protein-binding, family B, member 1 (Fe65)	APBB1	2.10E−09
	LUC7-like (S. cerevisiae)	LUC7L	2.19E−09
	CCAAT/enhancer binding protein (C/EBP), zeta	CEBPZ	2.25E−09
	ring finger protein 125	RNF125	2.28E−09
	polymerase (DNA directed), gamma	POLG	2.41E−09
	mitogen-activated protein kinase-activated protein kinase 3	MAPKAPK3	2.41E−09
	protein phosphatase 2, regulatory subunit A, beta	PPP2R1B	2.42E−09
	eukaryotic translation initiation factor 3, subunit J	EIF3J	2.70E−09
	crystallin, alpha B	CRYAB	2.71E−09
	L1 cell adhesion molecule	L1CAM	2.81E−09
	eukaryotic translation initiation factor 4E	EIF4E	2.82E−09
	ATP-binding cassette, sub-family D (ALD), member 2	ABCD2	2.83E−09
	protocadherin 10	PCDH10	2.88E−09
	mesencephalic astrocyte-derived neurotrophic factor	MANF	2.90E−09
	mex-3 homolog C (C. elegans)	MEX3C	2.90E−09
	doublecortin	DCX	2.91E−09
	glutaryl-CoA dehydrogenase	GCDH	3.00E−09
	chondroitin sulfate synthase 1	CHSY1	3.16E−09
	solute carrier family 27 (fatty acid transporter), member 1	SLC27A1	3.17E−09
	erbb2 interacting protein	ERBB2IP	3.21E−09
	X-prolyl aminopeptidase (aminopeptidase P) 3, putative	XPNPEP3	3.24E−09
	chloride channel 2	CLCN2	3.26E−09
	C-type lectin domain family 7, member A	CLEC7A	3.32E−09
	laminin, gamma 2	LAMC2	3.42E−09
	chromosome 1 open reading frame 128	C1orf128	3.62E−09
	DEAD (Asp-Glu-Ala-Asp) box polypeptide 54	DDX54	3.69E−09
	solute carrier family 39 (zinc transporter), member 6	SLC39A6	3.75E−09
	interferon regulatory factor 1	IRF1	3.76E−09
	low density lipoprotein receptor-related protein associated protein 1	LRPAP1	3.84E−09
	kelch-like ECH-associated protein 1	KEAP1	3.87E−09
	family with sequence similarity 98, member A	FAM98A	3.89E−09
	c-src tyrosine kinase	CSK	3.89E−09
	transporter 1, ATP-binding cassette, sub-family B (MDR/TAP)	TAP1	3.90E−09
	caspase 7, apoptosis-related cysteine peptidase	CASP7	3.97E−09
	fructosamine 3 kinase related protein	FN3KRP	4.13E−09
	ankyrin 2, neuronal	ANK2	4.28E−09
	retinoic acid induced 14	RAI14	4.34E−09
	attractin	ATRN	4.40E−09
	tumor necrosis factor receptor superfamily, member 1A	TNFRSF1A	4.46E−09
	transducin (beta)-like 3	TBL3	4.50E−09
	tyrosyl-tRNA synthetase	YARS	4.58E−09
	phytanoyl-CoA 2-hydroxylase interacting protein	PHYHIP	4.71E−09
	mediator complex subunit 15	MED15	4.71E−09
	t-complex 1	TCP1	4.89E−09
	chromosome 12 open reading frame 11	C12orf11	4.95E−09
	deformed epidermal autoregulatory factor 1 (Drosophila)	DEAF1	4.97E−09
	TGF-beta activated kinase 1/MAP3K7 binding protein 1	TAB1	5.01E−09
	apoptosis antagonizing transcription factor	AATF	5.03E−09
	Fanconi anemia, complementation group L	FANCL	5.07E−09
	exportin 1 (CRM1 homolog, yeast)	XPO1	5.10E−09
	nuclear import 7 homolog (S. cerevisiae)	NIP7	5.11E−09
	MYB binding protein (P160) 1a	MYBBP1A	5.12E−09
	DiGeorge syndrome critical region gene 2	DGCR2	5.16E−09
	proteasome (prosome, macropain) 26S subunit, ATPase, 4	PSMC4	5.29E−09
	nuclear factor (erythroid-derived 2)-like 2	NFE2L2	5.40E−09
	cold shock domain protein A	CSDA	5.50E−09
	neurexophilin 1	NXPH1	5.52E−09
	Mdm2 p53 binding protein homolog (mouse)	MDM2	5.52E−09
	gap junction protein, beta 6, 30kDa	GJB6	5.68E−09
	solute carrier family 30 (zinc transporter), member 7	SLC30A7	5.74E−09
	RAN, member RAS oncogene family	RAN	5.77E−09
	lectin, galactoside-binding, soluble, 9B	LGALS9B	5.83E−09
	lin-7 homolog B (C. elegans)	LIN7B	5.86E−09
	Cbp/p300-interacting transactivator, with Glu/Asp-rich carboxy-terminal domain, 1	CITED1	5.91E−09
	arginine-glutamic acid dipeptide (RE) repeats	RERE	5.91E−09
	solute carrier family 6 (neurotransmitter transporter, GABA), member 1	SLC6A1	6.00E−09
	muscleblind-like 2 (Drosophila)	MBNL2	6.05E−09
	N-myristoyltransferase 1	NMT1	6.09E−09
	DDB1 and CUL4 associated factor 8	DCAF8	6.16E−09
	fibroblast growth factor receptor 1	FGFR1	6.33E−09
	ring finger protein 149	RNF149	6.48E−09
	ubiquitin-conjugating enzyme E2D 3 (UBC4/5 homolog, yeast)	Ube2d3	6.68E−09
	cyclin-dependent kinase inhibitor 1A (p21, Cip1)	CDKN1A	6.74E−09
	3'-phosphoadenosine 5'-phosphosulfate synthase 2	PAPSS2	6.95E−09
	von Hippel-Lindau tumor suppressor	VHL	6.99E−09
	ralA binding protein 1	RALBP1	7.04E−09
	SH3 and cysteine rich domain 2	STAC2	7.20E−09
	FIP1 like 1 (S. cerevisiae)	FIP1L1	7.23E−09
	SMEK homolog 1, suppressor of mek1 (Dictyostelium)	SMEK1	7.27E−09
	RuvB-like 2 (E. coli)	RUVBL2	7.52E−09
	phosphatidylinositol transfer protein, beta	PITPNB	7.79E−09
	plexin domain containing 2	PLXDC2	7.80E−09
	SH3-domain GRB2-like endophilin B1	SH3GLB1	7.81E−09
	chimerin (chimaerin) 1	Chn1	7.86E−09
	defects in morphology 1 homolog (S. cerevisiae)	DEM1	8.03E−09
	pleckstrin	PLEK	8.37E−09
	casein kinase 2, alpha prime polypeptide	CSNK2A2	8.49E−09
	trinucleotide repeat containing 6B	TNRC6B	8.53E−09
	intercellular adhesion molecule 5, telencephalin	ICAM5	8.54E−09
	mannosyl-oligosaccharide glucosidase	MOGS	8.77E−09
	solute carrier family 2 (facilitated glucose transporter), member 3	SLC2A3	8.88E−09
	B-cell CLL/lymphoma 10	BCL10	8.92E−09
	reticulon 1	RTN1	9.02E−09
	cullin-associated and neddylation-dissociated 1	CAND1	9.27E−09
	tRNA-yW synthesizing protein 1 homolog (S. cerevisiae)	TYW1	9.32E−09
	proteolipid protein 2 (colonic epithelium-enriched)	PLP2	9.38E−09
	proteasome (prosome, macropain) 26S subunit, ATPase, 2	PSMC2	9.57E−09
	pescadillo homolog 1, containing BRCT domain (zebrafish)	PES1	9.74E−09
	S-phase cyclin A-associated protein in the ER	SCAPER	9.75E−09
	salt-inducible kinase 2	SIK2	9.76E−09
	eukaryotic translation initiation factor 5B	EIF5B	9.86E−09
	ELAV (embryonic lethal, abnormal vision, Drosophila)-like 1 (Hu antigen R)	ELAVL1	9.92E−09
	nardilysin (N-arginine dibasic convertase)	NRD1	9.94E−09
	UDP-glucose 6-dehydrogenase	UGDH	1.01E−08
	annexin A7	ANXA7	1.03E−08
	kelch-like 21 (Drosophila)	KLHL21	1.09E−08
	zinc finger, AN1-type domain 2A	ZFAND2A	1.09E−08
	Shwachman-Bodian-Diamond syndrome	SBDS	1.09E−08
	ERBB receptor feedback inhibitor 1	ERRFI1	1.21E−08
	beta-1,3-glucuronyltransferase 2 (glucuronosyltransferase S)	B3GAT2	1.22E−08
	RAP1B, member of RAS oncogene family	RAP1B	1.22E−08
	adrenomedullin	ADM	1.25E−08
	tetraspanin 7	TSPAN7	1.25E−08
	CDC42 effector protein (Rho GTPase binding) 4	CDC42EP4	1.26E−08
	proliferating cell nuclear antigen	PCNA	1.26E−08
	zinc finger CCCH-type containing 15	ZC3H15	1.29E−08
	NEDD4 binding protein 1	N4BP1	1.31E−08
	capping protein (actin filament) muscle Z-line, alpha 1	CAPZA1	1.33E−08
	cyclin H	CCNH	1.35E−08
	ubiquitin specific peptidase 30	USP30	1.36E−08
	CD63 molecule	CD63	1.41E−08
	dynein, cytoplasmic 1, intermediate chain 1	DYNC1I1	1.43E−08
	protocadherin 8	PCDH8	1.46E−08
	consortin, connexin sorting protein	CNST	1.49E−08
	TRK-fused gene	TFG	1.52E−08
	aldehyde dehydrogenase 1 family, member L1	ALDH1L1	1.53E−08
	polymerase (DNA directed), gamma 2, accessory subunit	POLG2	1.54E−08
	RAS guanyl releasing protein 2 (calcium and DAG-regulated)	RASGRP2	1.54E−08
	TBP-like 1	TBPL1	1.57E−08
	chaperonin containing TCP1, subunit 2 (beta)	CCT2	1.58E−08
	sphingosine-1-phosphate receptor 1	S1PR1	1.59E−08
	DEAD (Asp-Glu-Ala-Asp) box polypeptide 21	DDX21	1.63E−08
	v-myc myelocytomatosis viral oncogene homolog 1, lung carcinoma derived (avian)	MYCL1	1.64E−08
	F-box protein 4	FBXO4	1.66E−08
	glycerophosphocholine phosphodiesterase GDE1 homolog (S. cerevisiae)	GPCPD1	1.71E−08
	intraflagellar transport 122 homolog (Chlamydomonas)	IFT122	1.72E−08
	syndecan 1	SDC1	1.73E−08
	cell division cycle 16 homolog (S. cerevisiae)	CDC16	1.73E−08
	chromatin modifying protein 1B	CHMP1B	1.74E−08
	protein tyrosine phosphatase, receptor type, M	PTPRM	1.76E−08
	zinc finger protein 259	ZNF259	1.80E−08
	histamine N-methyltransferase	HNMT	1.82E−08
	gamma-aminobutyric acid (GABA) A receptor, gamma 2	GABRG2	1.82E−08
	chromosome 11 open reading frame 54	C11orf54	1.86E−08
	neuregulin 1	NRG1	1.87E−08
		null	1.89E−08
	polypyrimidine tract binding protein 1	PTBP1	1.90E−08
	prostaglandin E synthase	PTGES	1.91E−08
		null	1.96E−08
	cysteine and histidine-rich domain (CHORD)-containing 1	CHORDC1	1.98E−08
	5'-nucleotidase, ecto (CD73)	NT5E	2.00E−08
	CD3e molecule, epsilon associated protein	CD3EAP	2.04E−08
	T-cell acute lymphocytic leukemia 1	TAL1	2.08E−08
	sortilin-related VPS10 domain containing receptor 3	SORCS3	2.09E−08
	tropomyosin 4	TPM4	2.10E−08
	interferon stimulated exonuclease gene 20kDa	ISG20	2.10E−08
	major histocompatibility complex, class II, DM alpha	HLA-DMA	2.11E−08
	lysine (K)-specific demethylase 1A	KDM1A	2.20E−08
	Cdk5 and Abl enzyme substrate 1	CABLES1	2.24E−08
	cAMP-regulated phosphoprotein, 19kDa	ARPP19	2.24E−08
	Fas (TNF receptor superfamily, member 6)	FAS	2.25E−08
	apoptosis inhibitor 5	API5	2.26E−08
	aminolevulinate, delta-, synthase 1	ALAS1	2.30E−08
	EH-domain containing 4	EHD4	2.30E−08
	solute carrier family 7 (cationic amino acid transporter, y+ system), member 4	SLC7A4	2.32E−08
	CCHC-type zinc finger, nucleic acid binding protein	CNBP	2.32E−08
	capping protein (actin filament), gelsolin-like	CAPG	2.33E−08
	phosphoinositide-3-kinase interacting protein 1	PIK3IP1	2.34E−08
	tousled-like kinase 2	TLK2	2.37E−08
	ATP-binding cassette, sub-family B (MDR/TAP), member 6	ABCB6	2.37E−08
	heat shock 10kDa protein 1 (chaperonin 10)	HSPE1	2.39E−08
	tRNA methyltransferase 61 homolog A (S. cerevisiae)	TRMT61A	2.43E−08
	protein tyrosine phosphatase type IVA, member 3	PTP4A3	2.48E−08
	ribulose-5-phosphate-3-epimerase	RPE	2.57E−08
	RCD1 required for cell differentiation1 homolog (S. pombe)	RQCD1	2.59E−08
	RecQ protein-like (DNA helicase Q1-like)	RECQL	2.60E−08
	potassium intermediate/small conductance calcium-activated channel, subfamily N, member 3	KCNN3	2.71E−08
	peptidylprolyl isomerase D	PPID	2.72E−08
	myosin VB	MYO5B	2.75E−08
	pyruvate dehyrogenase phosphatase catalytic subunit 1	PDP1	2.77E−08
	polyhomeotic homolog 2 (Drosophila)	PHC2	2.78E−08
	serum/glucocorticoid regulated kinase 1	SGK1	2.80E−08
	M-phase phosphoprotein 10 (U3 small nucleolar ribonucleoprotein)	MPHOSPH10	2.81E−08
	poly(A) binding protein, cytoplasmic 1	PABPC1	2.82E−08
	high-mobility group 20A	HMG20A	2.84E−08
	PR domain containing 2, with ZNF domain	PRDM2	2.91E−08
	protein kinase C, delta	PRKCD	2.95E−08
	integrin alpha FG-GAP repeat containing 1	ITFG1	2.99E−08
	A kinase (PRKA) anchor protein 2	AKAP2/PALM2-AKAP2	3.02E−08
	CCR4 carbon catabolite repression 4-like (S. cerevisiae)	CCRN4L	3.02E−08
	actin-like 6A	ACTL6A	3.11E−08
	spastic paraplegia 20 (Troyer syndrome)	SPG20	3.14E−08
	neuropeptide Y receptor Y5	NPY5R	3.17E−08
	vasodilator-stimulated phosphoprotein	VASP	3.19E−08
	2,4-dienoyl CoA reductase 2, peroxisomal	DECR2	3.20E−08
	transforming, acidic coiled-coil containing protein 2	TACC2	3.26E−08
	transducin-like enhancer of split 2 (E(sp1) homolog, Drosophila)	TLE2	3.28E−08
	insulin-like growth factor binding protein 3	IGFBP3	3.28E−08
	RNA binding motif protein 4B	RBM4B	3.31E−08
	ubiquitin specific peptidase 36	USP36	3.32E−08
	lectin, mannose-binding 2	LMAN2	3.32E−08
	copine VI (neuronal)	CPNE6	3.35E−08
	secretion regulating guanine nucleotide exchange factor	SERGEF	3.35E−08
	transcription elongation factor A (SII)-like 1	TCEAL1	3.41E−08
	prolyl 4-hydroxylase, alpha polypeptide III	P4HA3	3.42E−08
	solute carrier family 25 (mitochondrial carrier; phosphate carrier), member 25	SLC25A25	3.42E−08
	integrin, alpha 5 (fibronectin receptor, alpha polypeptide)	ITGA5	3.42E−08
	ATPase, H+ transporting V0 subunit e2	ATP6V0E2	3.43E−08
	interleukin 33	IL33	3.43E−08
	chromosome 10 open reading frame 58	C10orf58	3.43E−08
	UTP3, small subunit (SSU) processome component, homolog (S. cerevisiae)	UTP3	3.43E−08
	tumor suppressing subtransferable candidate 4	TSSC4	3.43E−08
	MAD2 mitotic arrest deficient-like 2 (yeast)	MAD2L2	3.45E−08
	ankyrin repeat domain 28	ANKRD28	3.49E−08
	B-cell translocation gene 1, anti-proliferative	BTG1	3.50E−08
	melanin-concentrating hormone receptor 1	MCHR1	3.52E−08
	v-maf musculoaponeurotic fibrosarcoma oncogene homolog B (avian)	MAFB	3.54E−08
	DPH3, KTI11 homolog (S. cerevisiae)	DPH3	3.58E−08
	scavenger receptor class B, member 1	SCARB1	3.60E−08
	chemokine (C-X-C motif) ligand 3	CXCL3	3.68E−08
	lin-54 homolog (C. elegans)	LIN54	3.69E−08
	hemopoietic cell kinase	HCK	3.72E−08
	chromosome 14 open reading frame 4	C14orf4	3.73E−08
	pre-B-cell leukemia homeobox 2	PBX2	3.86E−08
	vascular cell adhesion molecule 1	VCAM1	3.87E−08
	profilin 1	PFN1	3.87E−08
	hairy/enhancer-of-split related with YRPW motif 1	HEY1	3.90E−08
	mediator complex subunit 13	MED13	4.06E−08
	neuritin 1	NRN1	4.14E−08
	deoxythymidylate kinase (thymidylate kinase)	DTYMK	4.29E−08
	thyroid hormone receptor interactor 10	TRIP10	4.30E−08
	serum response factor (c-fos serum response element-binding transcription factor)	SRF	4.31E−08
	chromosome 4 open reading frame 19	C4orf19	4.32E−08
	fibroblast growth factor receptor 2	FGFR2	4.32E−08
	uridine-cytidine kinase 2	UCK2	4.34E−08
	slit homolog 2 (Drosophila)	SLIT2	4.36E−08
	docking protein 4	DOK4	4.38E−08
	seven in absentia homolog 2 (Drosophila)	SIAH2	4.38E−08
	SET domain containing (lysine methyltransferase) 8	SETD8	4.44E−08
	solute carrier family 20 (phosphate transporter), member 1	SLC20A1	4.45E−08
	interleukin 1 receptor antagonist	IL1RN	4.51E−08
	WW and C2 domain containing 1	WWC1	4.65E−08
	ST3 beta-galactoside alpha-2,3-sialyltransferase 3	ST3GAL3	4.84E−08
	F-box protein 38	FBXO38	4.88E−08
	BTB (POZ) domain containing 10	BTBD10	4.88E−08
	period homolog 1 (Drosophila)	PER1	4.88E−08
	N-terminal EF-hand calcium binding protein 2	NECAB2	4.91E−08
	carbonic anhydrase XI	CA11	4.93E−08
	proliferation-associated 2G4, 38kDa	PA2G4	4.98E−08
	adenosine A3 receptor	ADORA3	4.99E−08
	armadillo repeat gene deleted in velocardiofacial syndrome	ARVCF	5.02E−08
	histidyl-tRNA synthetase	HARS	5.07E−08
	lipid phosphate phosphatase-related protein type 3	LPPR3	5.10E−08
	transducin (beta)-like 1 X-linked receptor 1	TBL1XR1	5.15E−08
	EBNA1 binding protein 2	EBNA1BP2	5.19E−08
	regulator of G-protein signaling 7 binding protein	RGS7BP	5.33E−08
	transgelin 2	TAGLN2	5.41E−08
	chromobox homolog 7	CBX7	5.52E−08
	calcium channel, voltage-dependent, beta 3 subunit	CACNB3	5.56E−08
	ubiquitin-like modifier activating enzyme 5	UBA5	5.58E−08
	G protein-coupled receptor 12	GPR12	5.69E−08
	TIMP metallopeptidase inhibitor 4	TIMP4	5.79E−08
	zinc finger, CCHC domain containing 24	ZCCHC24	5.83E−08
	golgin A3	GOLGA3	5.84E−08
	breast cancer anti-estrogen resistance 3	BCAR3	5.85E−08
	CDV3 homolog (mouse)	CDV3	5.92E−08
	ATP-binding cassette, sub-family G (WHITE), member 4	ABCG4	6.13E−08
	src kinase associated phosphoprotein 2	SKAP2	6.29E−08
	DnaJ (Hsp40) homolog, subfamily B, member 5	DNAJB5	6.29E−08
	fibronectin type III domain containing 3A	FNDC3A	6.30E−08
	multiple endocrine neoplasia I	MEN1	6.32E−08
	thyroid hormone receptor interactor 12	TRIP12	6.43E−08
	Rho guanine nucleotide exchange factor (GEF) 25	ARHGEF25	6.61E−08
	DDB1 and CUL4 associated factor 12-like 1	DCAF12L1	6.63E−08
	peroxisomal biogenesis factor 13	PEX13	6.66E−08
	F-box and leucine-rich repeat protein 4	FBXL4	6.69E−08
	mediator complex subunit 24	MED24	6.78E−08
	mitochondrial ribosomal protein L24	MRPL24	6.81E−08
	numb homolog (Drosophila)	NUMB	6.82E−08
	Thy-1 cell surface antigen	THY1	6.86E−08
	DnaJ (Hsp40) homolog, subfamily B, member 9	DNAJB9	6.92E−08
	adenylate kinase 2	AK2	6.96E−08
	ADAM metallopeptidase domain 11	ADAM11	6.99E−08
	integral membrane protein 2C	ITM2C	7.08E−08
	collagen, type IV, alpha 1	COL4A1	7.10E−08
	transient receptor potential cation channel, subfamily C, member 6	TRPC6	7.19E−08
	survival of motor neuron 1, telomeric	SMN1/SMN2	7.20E−08
	furry homolog (Drosophila)	FRY	7.24E−08
	cathepsin B	CTSB	7.30E−08
	ribosomal RNA processing 9, small subunit (SSU) processome component, homolog (yeast)	RRP9	7.31E−08
	PAK1 interacting protein 1	PAK1IP1	7.47E−08
	v-Ki-ras2 Kirsten rat sarcoma viral oncogene homolog	KRAS	7.55E−08
	A kinase (PRKA) anchor protein 12	AKAP12	7.68E−08
	UDP-glucose pyrophosphorylase 2	UGP2	7.81E−08
	doublecortin-like kinase 3	DCLK3	7.82E−08
	copine IV	CPNE4	7.88E−08
	protein phosphatase 1, regulatory (inhibitor) subunit 14B	PPP1R14B	7.99E−08
	heterogeneous nuclear ribonucleoprotein L-like	HNRPLL	8.28E−08
	RB1-inducible coiled-coil 1	RB1CC1	8.28E−08
	leukotriene A4 hydrolase	LTA4H	8.36E−08
	dynamin 1	DNM1	8.52E−08
	peroxisomal membrane protein 2, 22kDa	PXMP2	8.55E−08
	RNA binding motif protein 17	RBM17	8.57E−08
	MOB1, Mps One Binder kinase activator-like 1B (yeast)	MOBKL1B	8.66E−08
	chaperonin containing TCP1, subunit 7 (eta)	CCT7	8.67E−08
	phosphofructokinase, muscle	PFKM	9.12E−08
	leucine aminopeptidase 3	LAP3	9.16E−08
	serine/arginine-rich splicing factor 2	SRSF2	9.41E−08
	antizyme inhibitor 1	AZIN1	9.43E−08
	solute carrier family 7 (cationic amino acid transporter, y+ system), member 1	SLC7A1	9.44E−08
	G protein-coupled receptor 37 (endothelin receptor type B-like)	GPR37	9.49E−08
	numb homolog (Drosophila)-like	NUMBL	9.56E−08
	zinc and ring finger 2	ZNRF2	9.57E−08
	actin related protein 2/3 complex, subunit 2, 34kDa	ARPC2	9.62E−08
	MyoD family inhibitor domain containing	MDFIC	9.90E−08
	cyclin-dependent kinase 2 associated protein 1	CDK2AP1	9.96E−08
	small nuclear RNA activating complex, polypeptide 5, 19kDa	SNAPC5	1.01E−07
	synaptotagmin-like 2	SYTL2	1.01E−07
	protein phosphatase 3, catalytic subunit, alpha isozyme	PPP3CA	1.02E−07
	PYD and CARD domain containing	PYCARD	1.02E−07
	DNA-damage-inducible transcript 3	DDIT3	1.02E−07
	G protein-coupled receptor 158	GPR158	1.03E−07
	glutamate receptor, metabotropic 3	GRM3	1.03E−07
	cell growth regulator with EF-hand domain 1	CGREF1	1.06E−07
	transglutaminase 1 (K polypeptide epidermal type I, protein-glutamine-gamma-glutamyltransferase)	TGM1	1.07E−07
	pumilio homolog 1 (Drosophila)	PUM1	1.10E−07
	SEC13 homolog (S. cerevisiae)	SEC13	1.11E−07
	topoisomerase (DNA) I	TOP1	1.13E−07
	WAS protein family, member 1	WASF1	1.15E−07
	N-terminal EF-hand calcium binding protein 3	NECAB3	1.15E−07
	6-phosphofructo-2-kinase/fructose-2,6-biphosphatase 2	PFKFB2	1.15E−07
	sirtuin 7	SIRT7	1.15E−07
	kelch repeat and BTB (POZ) domain containing 8	KBTBD8	1.16E−07
	guanine nucleotide binding protein-like 3 (nucleolar)	GNL3	1.16E−07
	golgin A5	GOLGA5	1.17E−07
	sterol O-acyltransferase 1	SOAT1	1.19E−07
	ankyrin repeat and SOCS box-containing 8	ASB8	1.20E−07
	EMI domain containing 1	EMID1	1.22E−07
	jumonji domain containing 1C	JMJD1C	1.22E−07
	transmembrane protein 14A	TMEM14A	1.23E−07
	tribbles homolog 1 (Drosophila)	TRIB1	1.23E−07
	pumilio homolog 2 (Drosophila)	PUM2	1.24E−07
	fibronectin type III domain containing 3B	FNDC3B	1.27E−07
	nucleoporin like 1	NUPL1	1.29E−07
	v-rel reticuloendotheliosis viral oncogene homolog A (avian)	RELA	1.29E−07
	ribonuclease P/MRP 38kDa subunit	RPP38	1.30E−07
	phosphodiesterase 4B, cAMP-specific	PDE4B	1.31E−07
	thyrotrophic embryonic factor	TEF	1.31E−07
	translocation associated membrane protein 1	TRAM1	1.34E−07
	microtubule associated tumor suppressor candidate 2	MTUS2	1.37E−07
	serine/arginine-rich splicing factor 2, interacting protein	SRSF2IP	1.38E−07
	chloride channel 4	CLCN4	1.38E−07
	polo-like kinase 2	PLK2	1.39E−07
	caveolin 2	CAV2	1.40E−07
	endothelin converting enzyme 1	ECE1	1.42E−07
	suppression of tumorigenicity 7	ST7	1.42E−07
	karyopherin alpha 2 (RAG cohort 1, importin alpha 1)	KPNA2	1.44E−07
	phosphodiesterase 2A, cGMP-stimulated	PDE2A	1.44E−07
	Ral GTPase activating protein, alpha subunit 1 (catalytic)	RALGAPA1	1.45E−07
	protein arginine methyltransferase 1	PRMT1	1.45E−07
	palmitoyl-protein thioesterase 1	PPT1	1.46E−07
	monoamine oxidase B	MAOB	1.51E−07
	transmembrane and coiled-coil domain family 2	TMCC2	1.51E−07
	ring finger protein 114	RNF114	1.53E−07
	coronin, actin binding protein, 2B	CORO2B	1.54E−07
	SDA1 domain containing 1	SDAD1	1.54E−07
	abhydrolase domain containing 8	ABHD8	1.55E−07
	hepatocyte growth factor-regulated tyrosine kinase substrate	HGS	1.56E−07
	SWI/SNF related, matrix associated, actin dependent regulator of chromatin, subfamily a, member 5	SMARCA5	1.56E−07
	interferon gamma receptor 1	IFNGR1	1.56E−07
	guanine nucleotide binding protein (G protein), alpha inhibiting activity polypeptide 3	GNAI3	1.56E−07
	abhydrolase domain containing 6	ABHD6	1.58E−07
	peroxiredoxin 6	PRDX6	1.59E−07
	ribosomal protein S6 kinase, 90kDa, polypeptide 6	RPS6KA6	1.63E−07
	chaperonin containing TCP1, subunit 6A (zeta 1)	CCT6A	1.63E−07
	transaldolase 1	TALDO1	1.64E−07
	phosphatidylinositol transfer protein, alpha	PITPNA	1.65E−07
	ankyrin repeat domain 49	ANKRD49	1.65E−07
	activity-dependent neuroprotector homeobox	ADNP	1.69E−07
	chromobox homolog 6	CBX6	1.69E−07
	interleukin 16 (lymphocyte chemoattractant factor)	IL16	1.70E−07
	BH3 interacting domain death agonist	BID	1.71E−07
	NGFI-A binding protein 2 (EGR1 binding protein 2)	NAB2	1.71E−07
	glutamate dehydrogenase 1	GLUD1	1.72E−07
	HtrA serine peptidase 1	HTRA1	1.72E−07
	filamin A interacting protein 1	FILIP1	1.75E−07
	nuclear cap binding protein subunit 1, 80kDa	NCBP1	1.76E−07
	tumor suppressor candidate 3	TUSC3	1.77E−07
	ubiquitin specific peptidase like 1	USPL1	1.77E−07
	ST3 beta-galactoside alpha-2,3-sialyltransferase 2	ST3GAL2	1.79E−07
	dipeptidyl-peptidase 10 (non-functional)	DPP10	1.80E−07
	processing of precursor 1, ribonuclease P/MRP subunit (S. cerevisiae)	POP1	1.82E−07
	protein tyrosine phosphatase, receptor type, A	PTPRA	1.83E−07
	solute carrier organic anion transporter family, member 1A2	SLCO1A2	1.84E−07
	RNA binding motif protein 5	RBM5	1.84E−07
	ankyrin repeat and sterile alpha motif domain containing 1B	ANKS1B	1.84E−07
	zinc fingers and homeoboxes 1	ZHX1	1.85E−07
	contactin 6	CNTN6	1.85E−07
	H3 histone, family 3C	H3F3C	1.88E−07
	hydroxysteroid (17-beta) dehydrogenase 12	HSD17B12	1.90E−07
	N(alpha)-acetyltransferase 15, NatA auxiliary subunit	NAA15	1.93E−07
	brain-specific angiogenesis inhibitor 3	BAI3	1.94E−07
	heterogeneous nuclear ribonucleoprotein M	HNRNPM	1.95E−07
	diacylglycerol kinase, epsilon 64kDa	DGKE	1.99E−07
	Rab geranylgeranyltransferase, alpha subunit	RABGGTA	2.05E−07
	A kinase (PRKA) anchor protein 6	AKAP6	2.11E−07
	catalase	CAT	2.12E−07
	proteasome (prosome, macropain) subunit, alpha type, 3	PSMA3	2.15E−07
	diacylglycerol O-acyltransferase 2	DGAT2	2.15E−07
	pleckstrin homology domain containing, family A member 6	PLEKHA6	2.16E−07
	glutaminyl-tRNA synthase (glutamine-hydrolyzing)-like 1	QRSL1	2.16E−07
	vacuolar protein sorting 41 homolog (S. cerevisiae)	VPS41	2.20E−07
	solute carrier family 35, member E1	SLC35E1	2.21E−07
	transient receptor potential cation channel, subfamily C, member 2, pseudogene	TRPC2	2.21E−07
	peroxisomal biogenesis factor 5	PEX5	2.27E−07
	SEC24 family, member D (S. cerevisiae)	SEC24D	2.28E−07
	deoxyhypusine synthase	DHPS	2.28E−07
	CLK4-associating serine/arginine rich protein	CLASRP	2.31E−07
	chromosome 1 open reading frame 57	C1orf57	2.35E−07
	retinoblastoma-like 1 (p107)	RBL1	2.37E−07
	sel-1 suppressor of lin-12-like (C. elegans)	SEL1L	2.40E−07
	alpha thalassemia/mental retardation syndrome X-linked	ATRX	2.41E−07
	lactate dehydrogenase B	LDHB	2.41E−07
	vacuolar protein sorting 37 homolog A (S. cerevisiae)	VPS37A	2.41E−07
	zinc finger protein 322A	ZNF322A	2.42E−07
	guanine monphosphate synthetase	GMPS	2.42E−07
	dual specificity phosphatase 15	DUSP15	2.42E−07
	REST corepressor 1	RCOR1	2.44E−07
	baculoviral IAP repeat-containing 2	BIRC2	2.52E−07
	tripartite motif-containing 32	TRIM32	2.52E−07
	heat shock 70kDa protein 5 (glucose-regulated protein, 78kDa)	HSPA5	2.59E−07
	ankyrin repeat domain 12	ANKRD12	2.59E−07
	UDP-Gal:betaGlcNAc beta 1,4- galactosyltransferase, polypeptide 6	B4GALT6	2.61E−07
	chromosome 2 open reading frame 43	C2orf43	2.63E−07
	family with sequence similarity 160, member A2	FAM160A2	2.65E−07
	glycine receptor, alpha 2	GLRA2	2.67E−07
	OAF homolog (Drosophila)	OAF	2.68E−07
	Ral GEF with PH domain and SH3 binding motif 2	RALGPS2	2.72E−07
	cadherin, EGF LAG seven-pass G-type receptor 2 (flamingo homolog, Drosophila)	CELSR2	2.73E−07
	tropomodulin 2 (neuronal)	TMOD2	2.73E−07
	glutamate receptor interacting protein 1	GRIP1	2.73E−07
	target of myb1 (chicken)-like 1	TOM1L1	2.76E−07
	zinc finger protein 655	ZNF655	2.77E−07
